# Supplementary material for: Is bone loss a physiological cost of reproduction in the Great fruit-eating bat Artibeus lituratus?
Source: PLoS One. 2019 Mar 28;14(3):e0213781. doi: 10.1371/journal.pone.0213781 (PMC6438481; doi:10.1371/journal.pone.0213781)
Supplement: S2 File — (XLSX) [file pone.0213781.s003.xlsx]

## Sheet: Hoja1
Reproductive_group	Body_weight_g	Bone_length_mm	Dry_bone_g	Wet_bone_g	Bone_water_content_%	Trabecular_bone _area_μm2	Trabecular_width_µm	Trabecular_separation_µm	Bone_calcium_content_mg*g-1	Phosphorous_bone_content_mg*g-1	Maximum_load_at_fracture _N	Maximum_displacement_at_fracture_mm	Bone_stiffness_N*mm-1
Inactive	66.95	42.81	0.3004	0.542	44.5756	24.005	192.142	45.1239	29.91	1.079	47.0149	1.2487	56.9654
Inactive	69.6	42.4	0.2835	0.567	50	24.7373	218.106	61.8293	27.3	1.029	41.7346	1.69725	40.453
Inactive	67.11	43.01	0.3017	0.506	40.3755	37.3431	194.775	111.517	32.445	1.14	47.9549	1.45425	60.1726
Inactive	84.48	44.08	0.3469	0.625	44.496	29.7184	272.725	93.0805	26.76	0.988	44.2741	1.54018	51.1942
Inactive	67.36	43.15	0.3417	0.448	23.7277	24.493	212.054	59.8183	33.135	1.112	35.2131	1.16507	33.1906
Inactive	58.43	41.56	0.3469	0.566	38.7102	33.6818	157.956	78.6368	22.62	0.86	31.7967	1.7167	27.7889
Inactive	81.18	46	0.2892	0.532	45.6391	33.1085	201.678	84.977	24.87	0.9	51.1441	1.98627	42.5657
Inactive	62.98	41.7	0.3539	0.618	42.7346	29.5839	207.062	76.4261	23.94	1.01	29.5102	2.20436	29.5328
Inactive	66.56	42.4	0.2887	0.522	44.6935	29.5839	207.062	76.4261	22.215	0.855	20.6011	1.24554	24.4917
Pregnancy	79.72	41.45	0.2822	0.493	42.7586	28.4307	200.646	61.7271	33.54	1.136	39.5652	1.78173	39.4617
Pregnancy	80.65	40.38	0.3493	0.534	34.588	32.8672	166.958	88.1736	26.55	0.923	42.752	2.06995	35.372
Pregnancy	88.78	42.2	0.363	0.533	31.8949	36.3509	184.215	83.6741	23.55	0.863	33.3254	1.41112	32.8489
Pregnancy	90.64	42.8	0.3989	0.608	34.3914	37.3828	83.7337	74.4394	28.59	0.908	41.6447	1.52164	44.4761
Pregnancy	78.74	43.75	0.4128	0.663	37.7376	33.4288	206.787	87.5098	26.145	0.977	57.4571	1.728	51.8963
Pregnancy	69.73	41.5	0.3315	0.52	36.25	17.4183	237.672	42.6269	27.88	0.974	44.1364	1.4977	52.4171
Pregnancy	74.5	43.6	0.37655	0.581	35.1893	24.7478	298.419	75.8424	27.7092	0.9635	43.8794	1.5079	48.1971
Pregnancy	75.45	44.3	0.359	0.561714	36.0567	30.0895	196.919	73.4276	28.0575	0.9575	51.5264	1.5936	49.1115
Lactation	67.98	41.83	0.271	0.487	44.3532	21.0886	238.631	55.4404	27.465	1.073	32.9691	1.09736	42.997
Lactation	65.41	42.6	0.294	0.572	48.6014	20.3045	238.184	48.8675	32.655	1.14	53.5404	1.50134	59.2387
Lactation	66.52	44.21	0.3717	0.568	34.5599	23.0746	214.36	55.9983	26.535	0.903	40.8531	1.43245	42.1996
Lactation	53.63	38.3	0.3603	0.614	41.3192	25.0913	189.199	63.7281	21.615	0.772	44.022	1.40679	49.1159
Lactation	71.406	43.3	0.2601	0.4	34.975	21.0527	233.245	56.3045	27.72	1.024	29.7423	1.42918	27.2104
Lactation	63.08	44.2	0.3704	0.56	33.8571	31.9666	191.585	80.5164	29.055	0.944	45.6069	1.48607	47.113
Lactation	73.841	44.15	0.3369	0.55	38.7455	25.2633	244.726	71.0192	24.855	0.926	31.3717	1.35975	39.2048
Lactation	73.938	42.45	0.3552	0.565	37.1327	18.5536	264.969	52.8667	27.1286	0.968857	47.8901	1.6688	46.3851
Postlactation	71.87	43.2	0.3103	0.515	39.7476	30.9813	223.808	100.236	32.22	1.088	33.371	1.07154	38.6628
Postlactation	71.55	42.8	0.4399	0.636	30.8333	34.8357	188.802	81.9828	25.095	0.895	53.1736	1.56273	54.5605
Postlactation	74.55	43.35	0.4209	0.663	36.5158	37.0858	224.712	89.2278	26.025	0.993	57.9392	1.23364	65.6851
Postlactation	71.164	41.9	0.3776	0.596	36.6443	31.1123	201.643	69.9093	23.85	0.888	51.3058	1.32712	41.4984
Postlactation	69.57	43.65	0.3362	0.548	38.6496	31.4983	157.073	63.0449	28.32	0.999	39.8868	1.49641	38.1088
Postlactation	71.74	42.78	0.4062	0.58	29.9655	38.1893	126.332	71.1931	25.35	0.898	48.2965	1.32107	54.8606
